# Supplementary material for: Structural diversity and photocatalytic activity of six Co(ii)/Ni(ii) complexes with three flexible phenylenediacetate isomers
Source: Royal Society of Chemistry journal article supplement (doi:10.1039/d0ce01702g), 2021-01-01
Supplement: d0ce01702g1.pdf [file d0ce01702g1.pdf]

## Supporting Information

### **Structural diversity and photocatalytic activities of six Co(II)/Ni(II) complexes with three flexible phenylenediacetate isomers**

Mei-Li Zhang,<sup>a</sup> Ye Bai,<sup>a</sup> Yi-Xia Ren,<sup>a</sup> Ji-Jiang Wang,<sup>a</sup> Xiao-Gang Yang,<sup>b\*</sup> Lu-Fang Ma<sup>b</sup>

<sup>a</sup>*Department of Chemistry and Chemical Engineering, Laboratory of New Energy & New Function Materials, Yan'an University, Yan'an, China,*

<sup>b</sup>*College of Chemistry and Chemical Engineering, Luoyang Normal University, Henan Province Function-Oriented Porous Materials Key Laboratory, Luoyang, China.*

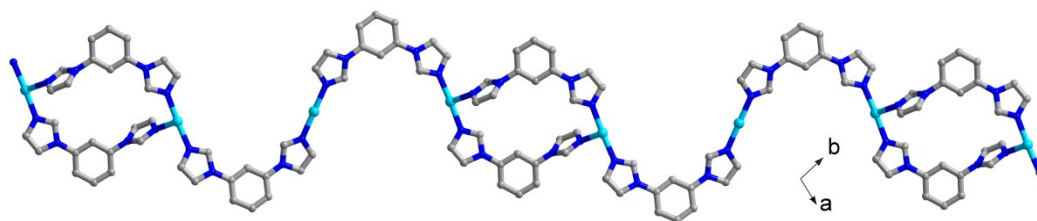

**Fig. S1** View of the 1D loop containing polymer chain of **1** along *ab* plan.

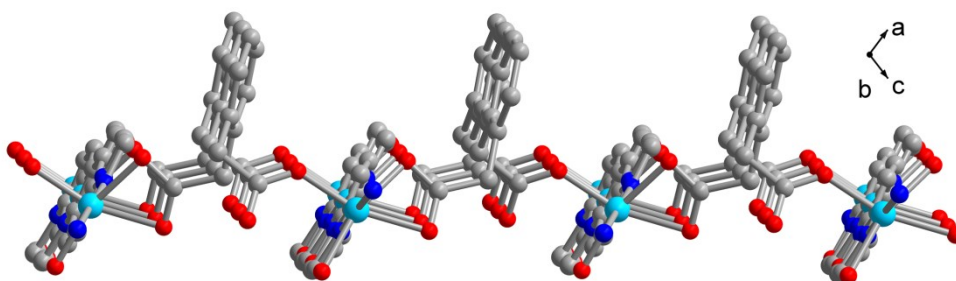

**Fig. S2** Ball-and-stick view of 2D layer along *ac* plan in **4**.

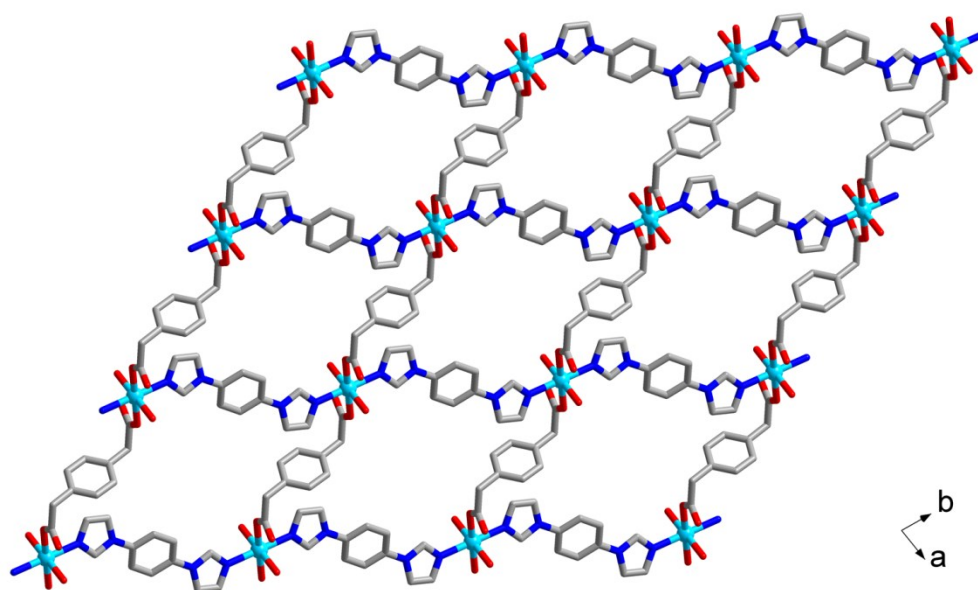

**Fig. S3** Ball-and-stick view of 2D layer along *ab* plan in **6**.



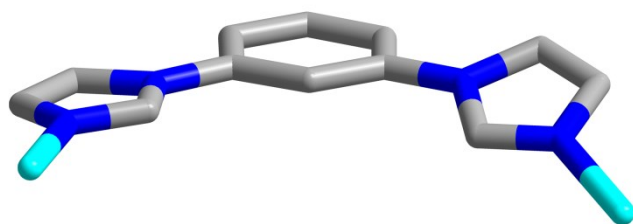

(1)

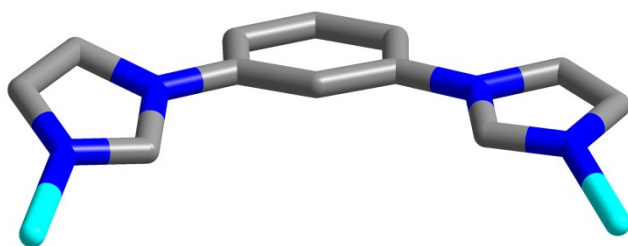

(2)

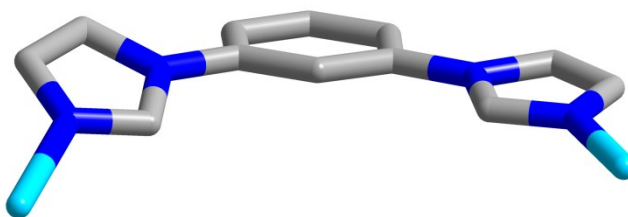

(3)

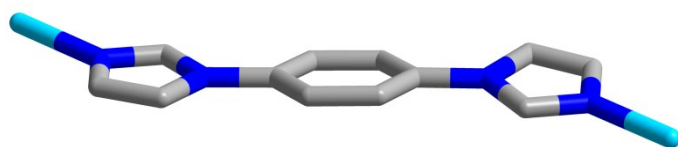

(4)

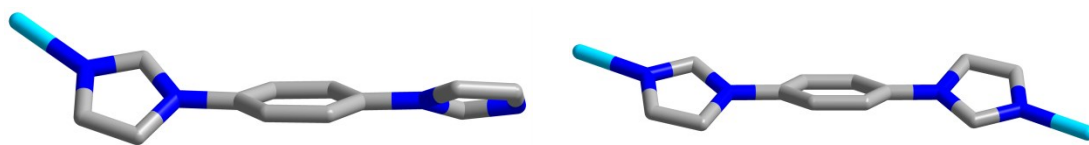

(5)

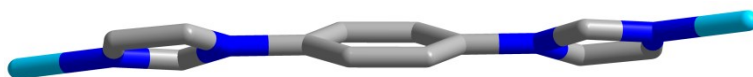

(6)

**Fig. S4** Coordination modes and conformations of bis(1-imidazolyl)benzene (bib) ligands in complexes **1-6**.

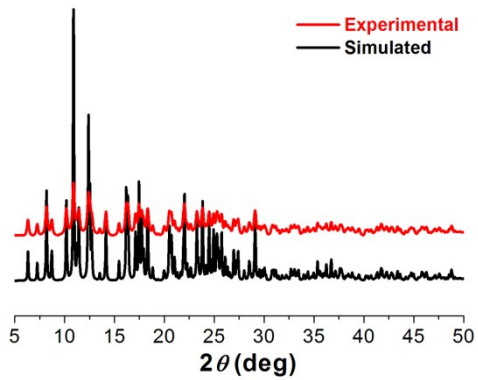

(1)

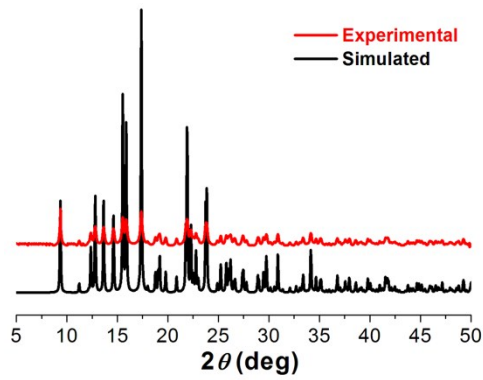

(2)

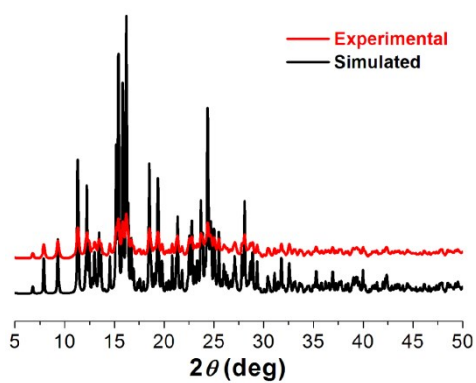

(3)

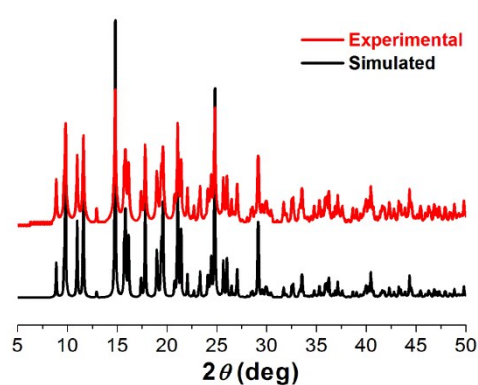

(4)

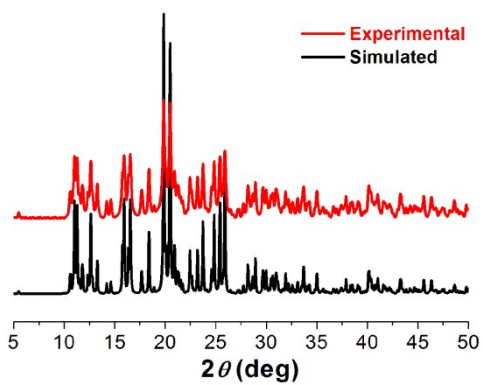

(5)

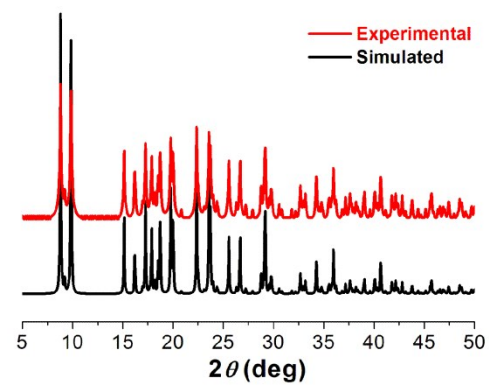

(6)

Fig. S5 PXR D patterns of complexes 1-6.

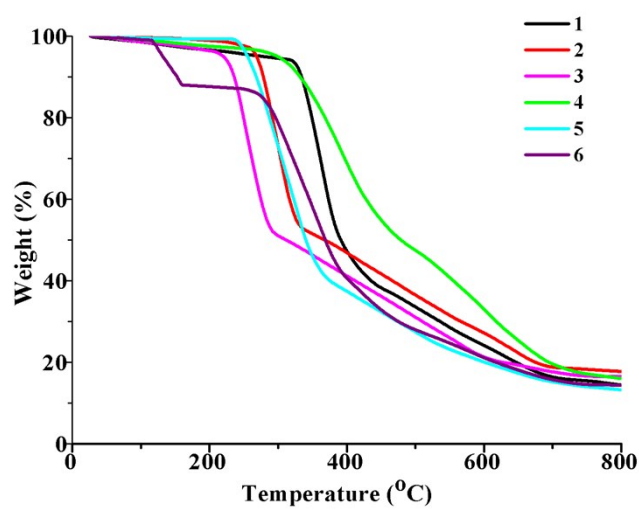

**Fig. S6** Thermal gravimetric analysis (TGA) curves of complexes **1-6**.

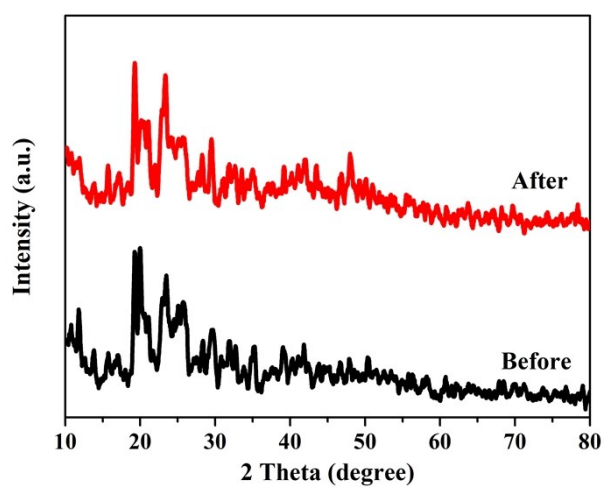

**Fig. S7** The PXRD pattern of the complex 4 before and after photocatalytic reaction.

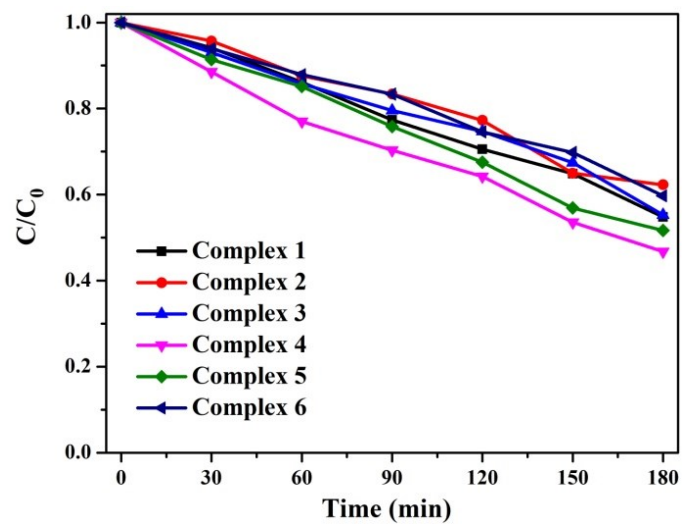

**Fig. S8** Photocatalytic degradation of MB as a function of irradiation time for different samples without  $H_2O_2$ .

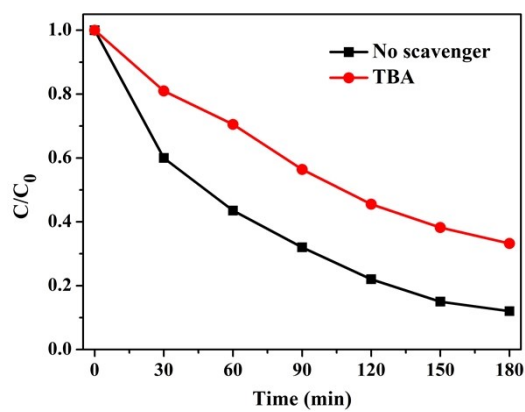

**Fig. S9** Photodegradation efficiency of MB in the presence of TBA scavenger over complex 4.

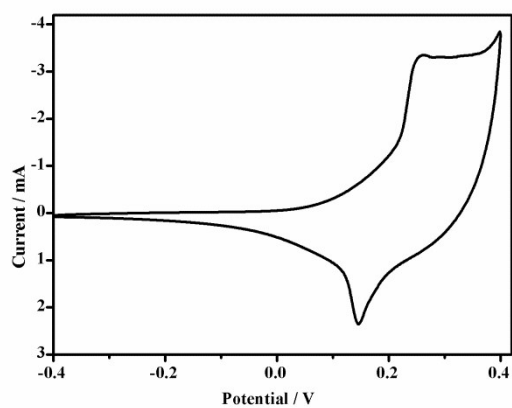



(a)

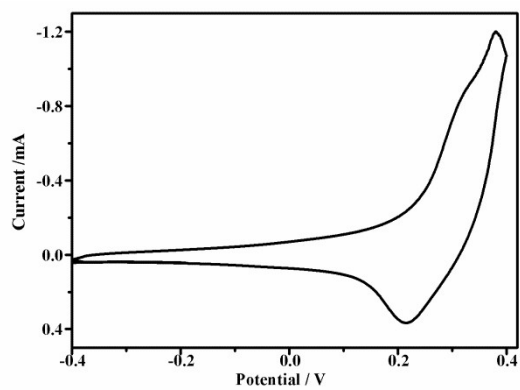

(b)

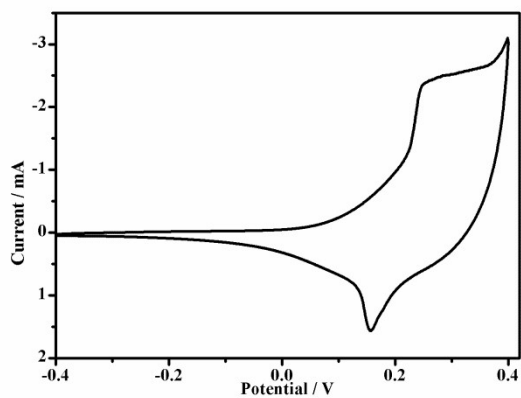

(c)

**Fig. S10** Cyclic voltammograms of complexes **4–6** (**a** for **4**, **b** for **5**, **c** for **6**).

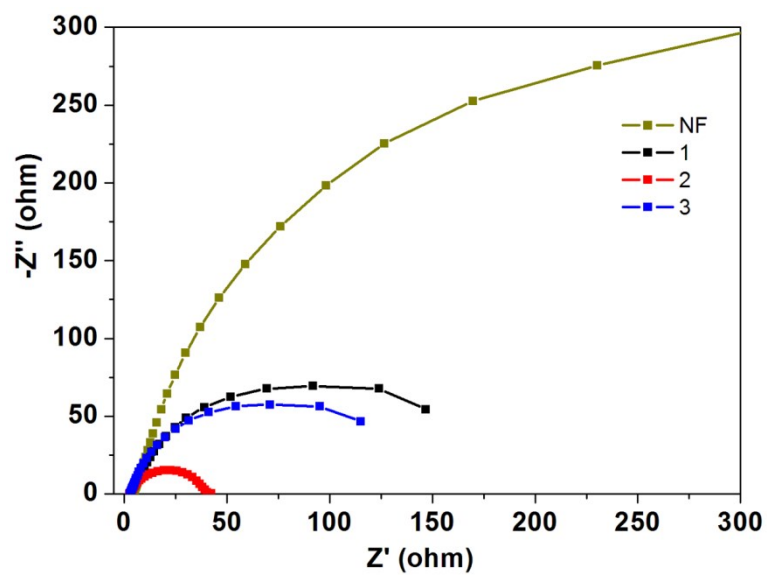

**Fig. S11** Electrochemical impedance spectroscopy (EIS) Nyquist plots of complexes 1–3 and blank nickel foam tested in 0.1 M KOH.

**Table S1.** Selected Bond Lengths (Å) and Bond Angles (°) for Complexes **1-6**.

| 1                 |            |                   |           |                   |            |
|-------------------|------------|-------------------|-----------|-------------------|------------|
| Bond              | Dist.      | Bond              | Dist.     | Bond              | Dist.      |
| Ni(1)-O(1)        | 2.068(2)   | Ni(2)-O(3)        | 2.055(2)  | Ni(1)-N(4B)       | 2.069(2)   |
| Ni(1)-O(1A)       | 2.068(2)   | Ni(2)-O(4)        | 2.073(2)  | Ni(1)-N(4C)       | 2.069(2)   |
| Ni(1)-O(8)        | 2.099(2)   | Ni(2)-O(6)        | 2.128(2)  | Ni(2)-N(5)        | 2.079(3)   |
| Ni(1)-O(8A)       | 2.099(2)   | Ni(2)-N(1)        | 2.069(2)  | Ni(2)-N(8D)       | 2.081(2)   |
| Angle             | (°)        | Angle             | (°)       | Angle             | (°)        |
| O(1A)-Ni(1)-O(1)  | 180.0      | N(4C)-Ni(1)-O(8)  | 87.56(9)  | O(4)-Ni(2)-O(6)   | 94.98(9)   |
| O(1)-Ni(1)-O(8A)  | 88.09(9)   | N(4C)-Ni(1)-O(8A) | 92.44(9)  | O(4)-Ni(2)-N(5)   | 87.07(10)  |
| O(1)-Ni(1)-O(8)   | 91.91(9)   | N(4B)-Ni(1)-O(8A) | 87.56(9)  | O(4)-Ni(2)-N(8D)  | 88.73(9)   |
| O(1A)-Ni(1)-O(8A) | 91.91(9)   | N(4B)-Ni(1)-O(8)  | 92.44(9)  | N(1)-Ni(2)-O(4)   | 92.99(9)   |
| O(1A)-Ni(1)-O(8)  | 88.09(9)   | N(4C)-Ni(1)-N(4B) | 180.0     | N(1)-Ni(2)-O(6)   | 89.48(10)  |
| O(1A)-Ni(1)-N(4C) | 88.67(9)   | O(3)-Ni(2)-O(4)   | 174.62(8) | N(1)-Ni(2)-N(5)   | 176.11(10) |
| O(1)-Ni(1)-N(4C)  | 91.33(9)   | O(3)-Ni(2)-O(6)   | 90.14(9)  | N(1)-Ni(2)-N(8D)  | 94.17(9)   |
| O(1)-Ni(1)-N(4B)  | 88.67(9)   | O(3)-Ni(2)-N(1)   | 88.72(9)  | N(5)-Ni(2)-O(6)   | 86.64(11)  |
| O(1A)-Ni(1)-N(4B) | 91.33(9)   | O(3)-Ni(2)-N(5)   | 91.57(10) | N(5)-Ni(2)-N(8D)  | 89.72(10)  |
| O(8)-Ni(1)-O(8A)  | 180.0      | O(3)-Ni(2)-N(8D)  | 86.06(9)  | N(8D)-Ni(2)-O(6)  | 174.66(9)  |
| 2                 |            |                   |           |                   |            |
| Bond              | Dist.      | Bond              | Dist.     | Bond              | Dist.      |
| Ni(1)-O(1A)       | 2.1186(16) | Ni(1)-O(2A)       | 2.136(2)  | Ni(1)-O(3)        | 2.116(2)   |
| Ni(1)-O(4)        | 2.1366(18) | Ni(1)-N(1)        | 2.041(2)  | Ni(1)-N(4A)       | 2.025(3)   |
| Angle             | (°)        | Angle             | (°)       | Angle             | (°)        |
| O(1A)-Ni(1)-O(2A) | 61.61(7)   | O(1A)-Ni(1)-O(4)  | 162.55(8) | O(2A)-Ni(1)-O(4)  | 105.46(8)  |
| O(3)-Ni(1)-O(1A)  | 105.01(8)  | O(3)-Ni(1)-O(2A)  | 91.97(10) | O(3)-Ni(1)-O(4)   | 61.86(7)   |
| N(1)-Ni(1)-O(1A)  | 97.32(8)   | N(1)-Ni(1)-O(2A)  | 94.92(10) | N(1)-Ni(1)-O(3)   | 157.26(8)  |
| N(1)-Ni(1)-O(4)   | 95.41(8)   | N(4A)-Ni(1)-O(1A) | 95.27(8)  | N(4A)-Ni(1)-O(2A) | 156.37(8)  |
| N(4A)-Ni(1)-O(3)  | 89.43(10)  | N(4A)-Ni(1)-O(4)  | 95.98(9)  | N(4A)-Ni(1)-N(1)  | 92.80(10)  |
| 3                 |            |                   |           |                   |            |
| Bond              | Dist.      | Bond              | Dist.     | Bond              | Dist.      |
| Ni(1)-O(1)        | 2.154(2)   | Ni(1)-O(2)        | 2.091(2)  | Ni(1)-O(3A)       | 2.083(2)   |
| Ni(1)-O(4A)       | 2.153(2)   | Ni(1)-N(1)        | 2.023(2)  | Ni(1)-N(4B)       | 2.039(2)   |

| Angle            | (°)        | Angle             | (°)       | Angle             | (°)       |
|------------------|------------|-------------------|-----------|-------------------|-----------|
| O(2)-Ni(1)-O(1)  | 62.31(7)   | O(2)-Ni(1)-O(4A)  | 100.32(9) | O(3A)-Ni(1)-O(1)  | 98.38(8)  |
| O(3A)-Ni(1)-O(2) | 155.68(8)  | O(3A)-Ni(1)-O(4A) | 62.21(8)  | O(4A)-Ni(1)-O(1)  | 87.80(8)  |
| N(1)-Ni(1)-O(1)  | 90.35(9)   | N(1)-Ni(1)-O(2)   | 98.80(9)  | N(1)-Ni(1)-O(3A)  | 95.77(9)  |
| N(1)-Ni(1)-O(4A) | 157.30(10) | N(1)-Ni(1)-N(4B)  | 96.97(10) | N(4B)-Ni(1)-O(1)  | 162.85(9) |
| N(4B)-Ni(1)-O(2) | 101.12(8)  | N(4B)-Ni(1)-O(3A) | 96.29(9)  | N(4B)-Ni(1)-O(4A) | 91.23(9)  |

**4**

| Bond             | Dist.      | Bond              | Dist.      | Bond             | Dist.      |
|------------------|------------|-------------------|------------|------------------|------------|
| Co(1)-O(4)       | 2.158(2)   | Co(1)-O(2A)       | 1.996(2)   | Co(1)-O(3)       | 2.273(3)   |
| Co(1)-O(5)       | 2.149(3)   | Co(1)-N(1)        | 2.118(3)   | Co(1)-N(4B)      | 2.107(3)   |
| Angle            | (°)        | Angle             | (°)        | Angle            | (°)        |
| O(1)-Co(1)-O(2)  | 59.63(9)   | O(4A)-Co(1)-O(2)  | 160.99(11) | O(4A)-Co(1)-O(1) | 101.37(10) |
| O(4A)-Co(1)-O(5) | 93.95(12)  | O(4A)-Co(1)-N(4B) | 92.53(12)  | O(4A)-Co(1)-N(1) | 88.41(12)  |
| O(5)-Co(1)-O(2)  | 104.93(11) | O(5)-Co(1)-O(1)   | 163.98(11) | N(4B)-Co(1)-O(2) | 88.88(11)  |
| N(4B)-Co(1)-O(1) | 163.98(11) | N(4B)-Co(1)-O(5)  | 92.45(11)  | N(4B)-Co(1)-N(1) | 178.93(12) |
| N(1)-Co(1)-O(2)  | 90.39(11)  | N(1)-Co(1)-O(1)   | 88.76(10)  | N(1)-Co(1)-O(5)  | 86.98(11)  |

**5**

| Bond             | Dist.      | Bond             | Dist.     | Bond             | Dist.      |
|------------------|------------|------------------|-----------|------------------|------------|
| Co(1)-O(2)       | 2.206(3)   | Co(1)-O(1)       | 2.199(2)  | Co(1)-O(4A)      | 2.042(3)   |
| Co(1)-O(3A)      | 2.149(3)   | Co(1)-N(1)       | 2.064(2)  | Co(1)-N(5)       | 2.043(2)   |
| Angle            | (°)        | Angle            | (°)       | Angle            | (°)        |
| O(4)-Co(1)-O(3)  | 58.14(7)   | O(2A)-Co(1)-O(4) | 94.97(8)  | O(2A)-Co(1)-O(3) | 145.43(9)  |
| O(2A)-Co(1)-N(1) | 121.76(9)  | O(2A)-Co(1)-N(5) | 96.95(8)  | O(4)-Co(1)-N(1)  | 99.81(9)   |
| N(1)-Co(1)-O(3)  | 86.62(8)   | N(5)-Co(1)-O(4)  | 130.40(9) | N(5)-Co(1)-N(1)  | 113.69(11) |
| N(4B)-Co(1)-O(1) | 163.98(11) | N(4B)-Co(1)-O(5) | 92.45(11) | N(4B)-Co(1)-N(1) | 178.93(12) |
| N(1)-Co(1)-O(2)  | 90.39(11)  | N(1)-Co(1)-O(1)  | 88.76(10) | N(1)-Co(1)-O(5)  | 86.98(11)  |

**6**

| Bond             | Dist.      | Bond            | Dist.      | Bond             | Dist.      |
|------------------|------------|-----------------|------------|------------------|------------|
| Co(1)-O(1)       | 2.1176(19) | Co(1)-O(1A)     | 2.1176(19) | Co(1)-N(1)       | 2.104(2)   |
| Co(1)-N(1A)      | 2.104(2)   | Co(1)-O(2)      | 2.1405(17) | Co(1)-N(2A)      | 2.1406(17) |
| Angle            | (°)        | Angle           | (°)        | Angle            | (°)        |
| N(1)-Co(1)-N(1A) | 180.0      | N(1)-Co(1)-O(1) | 87.76(8)   | N(1)-Co(1)-O(1A) | 92.24(8)   |

|                   |          |                   |           |                  |          |
|-------------------|----------|-------------------|-----------|------------------|----------|
| N(1A)-Co(1)-O(1A) | 92.24(9) | N(1A)-Co(1)-O(1)  | 87.76(8)  | O(1)-Co(1)-O(1A) | 180.0    |
| N(1)-Co(1)-O(2)   | 89.23(8) | N(1)-Co(1)-O(2A)  | 90.77(8)  | O(1)-Co(1)-O(2)  | 88.17(7) |
| O(1)-Co(1)-O(2A)  | 91.83(7) | N(1)-Co(1)-O(2)   | 90.775(8) | N(1)-Co(1)-O(2A) | 89.23(8) |
| O(1A)-Co(1)-O(2)  | 91.83(7) | O(1A)-Co(1)-O(2A) | 88.17(7)  | O(2)-Co(1)-O(2A) | 180.0    |

Symmetry code:

- 1 A: 1-x, -y, -z; B: 2-x, 1-y, 1-z; C: -1+x, -1+y, +z; D: 1-x, -y, 1-z.
- 2 A: -x+1/2, y-1/2, -z+1/2.
- 3 A: -x+3/2, y+1/2, z; B: -x+3/2, y-1/2, z.
- 4 A: x-1/2, -y+1/2, z-1/2; B: x, y-1, z; C: x+1/2, -y+1/2, +z; D: x, y+1, z.
- 5 A: x-1, y-1, z; B: -x-1, -y, -z+2; C: x+1, y+1, z.
- 6 A: x-1/2, -y+1/2, z-1/2; B: x, y-1, z; C: x+1/2, -y+1/2, +z; D: x, y+1, z.
